# Supplementary material for: Theoretical and Experimental Study of New Photochromic Bis-Spiropyrans with Hydroxyethyl and Carboxyethyl Substituents
Source: Hindawi journal article supplement (doi:10.1155/2013/752949), 2013-01-01
Supplement: f1 [file 752949.f1.pdf]

## Supplementary Data

### **Theoretical and experimental study of new photochromic bis-spiopyrans with hydroxyethyl and carboxyethyl substituents**

**E.L. Mukhanov<sup>1</sup>, I.V. Dorogan<sup>1</sup>, A.V. Chernyshev<sup>1</sup>, S.O. Bezuglyi<sup>2</sup>, I.V. Ozhogin<sup>1</sup>, B.S. Lukyanov<sup>1</sup>**

<sup>1</sup> Research-scientific Institute of Physical & Organic Chemistry, South Federal University, Russia, 344090, Rostov-on-Don, Stachky ave. 194/2, [jmukhanov@ipoc.sfedu.ru](mailto:jmukhanov@ipoc.sfedu.ru)

<sup>2</sup> Southern Science Center of Russian Academy of Sciences, Russia, 344006, Rostov-on-Don, st. Chekhova, 41, [photo@ipoc.sfedu.ru](mailto:photo@ipoc.sfedu.ru)

**Geometries of the compounds (2a,b) calculated by the CPCM-PBE0/6-311G\*\*  
method**

**Table 1 - Optimized structure (Cartesian coordinates, Å) of (2a) –TTC-Sp**

| ATOM | X         | Y         | Z         | ATOM | X         | Y         | Z         |
|------|-----------|-----------|-----------|------|-----------|-----------|-----------|
| 1 C  | 5.518462  | -3.859415 | -0.296475 | 49 C | -4.678958 | -1.817690 | 0.216744  |
| 2 C  | 6.531226  | -2.917638 | -0.150480 | 50 H | -5.153344 | 1.173923  | -0.709707 |
| 3 C  | 6.244773  | -1.556629 | -0.063727 | 51 H | -4.471792 | 3.553582  | -0.551582 |
| 4 C  | 4.910888  | -1.182104 | -0.131378 | 52 O | -3.112729 | -0.148953 | 0.888779  |
| 5 C  | 3.886746  | -2.111334 | -0.276996 | 53 N | -3.313076 | -0.689220 | -1.407114 |
| 6 C  | 4.183163  | -3.458109 | -0.361711 | 54 C | -4.448247 | -1.184766 | 2.539351  |
| 7 C  | 2.561157  | -1.387305 | -0.327757 | 55 C | -5.657196 | -2.746441 | 0.567300  |
| 8 C  | 3.001774  | 0.071451  | -0.165639 | 56 C | -5.422029 | -2.114188 | 2.872406  |
| 9 N  | 4.358280  | 0.104912  | -0.078311 | 57 C | -6.035580 | -2.893604 | 1.890786  |
| 10 C | 1.661177  | -1.848427 | 0.829303  | 58 O | -4.581812 | -2.464568 | -2.058049 |
| 11 C | 1.891487  | -1.628594 | -1.691273 | 59 H | -3.966126 | -0.567385 | 3.288741  |
| 12 C | 5.181921  | 1.297077  | 0.031015  | 60 H | -5.712083 | -2.227874 | 3.912015  |
| 13 C | 2.225400  | 1.216023  | -0.115914 | 61 H | -6.798416 | -3.613635 | 2.164725  |
| 14 O | 1.656371  | 3.995066  | 0.033142  | 62 H | -6.093400 | -3.346610 | -0.223641 |
| 15 C | 0.836573  | 1.216222  | -0.255111 | 63 C | -2.915693 | -0.402134 | -2.775215 |
| 16 C | -0.017113 | 2.316835  | -0.238537 | 64 H | -3.328587 | 0.557032  | -3.105010 |
| 17 C | 0.458097  | 3.707833  | -0.066685 | 65 H | -1.829098 | -0.365268 | -2.859480 |
| 18 C | -0.568329 | 4.734456  | -0.013892 | 66 H | -3.311507 | -1.200755 | -3.399097 |
| 19 C | -1.884625 | 4.438843  | -0.131516 |      |           |           |           |
| 20 C | -2.353256 | 3.101764  | -0.317570 |      |           |           |           |
| 21 C | -1.421040 | 2.093225  | -0.375972 |      |           |           |           |
| 22 H | 5.768088  | -4.912821 | -0.359290 |      |           |           |           |
| 23 H | 7.564604  | -3.243679 | -0.099946 |      |           |           |           |
| 24 H | 7.042323  | -0.832288 | 0.054466  |      |           |           |           |
| 25 H | 3.395321  | -4.196283 | -0.477690 |      |           |           |           |
| 26 H | 2.139143  | -1.663798 | 1.794618  |      |           |           |           |
| 27 H | 0.694214  | -1.342424 | 0.823302  |      |           |           |           |
| 28 H | 1.481142  | -2.923327 | 0.741686  |      |           |           |           |
| 29 H | 1.719488  | -2.699931 | -1.825782 |      |           |           |           |
| 30 H | 0.929818  | -1.118388 | -1.765836 |      |           |           |           |
| 31 H | 2.530051  | -1.281031 | -2.506831 |      |           |           |           |
| 32 H | 4.643447  | 2.134655  | -0.414965 |      |           |           |           |
| 33 H | 6.085743  | 1.132722  | -0.564401 |      |           |           |           |
| 34 H | 2.695750  | 2.175479  | 0.055565  |      |           |           |           |
| 35 H | 0.335663  | 0.264682  | -0.384337 |      |           |           |           |
| 36 H | -2.626789 | 5.232560  | -0.090764 |      |           |           |           |
| 37 H | -0.221472 | 5.752847  | 0.121555  |      |           |           |           |
| 38 C | -3.737766 | 2.754544  | -0.488636 |      |           |           |           |
| 39 C | 5.561977  | 1.625762  | 1.469991  |      |           |           |           |
| 40 H | 6.251785  | 2.473927  | 1.449472  |      |           |           |           |
| 41 H | 6.095442  | 0.774934  | 1.917707  |      |           |           |           |
| 42 O | 4.465902  | 2.020258  | 2.255954  |      |           |           |           |
| 43 H | 3.885181  | 1.265198  | 2.378136  |      |           |           |           |
| 44 C | -4.120329 | 1.473516  | -0.575979 |      |           |           |           |
| 45 C | -3.112936 | 0.377731  | -0.439588 |      |           |           |           |
| 46 O | -1.796609 | 0.807532  | -0.626933 |      |           |           |           |
| 47 C | -4.085821 | -1.037585 | 1.204955  |      |           |           |           |
| 48 C | -4.214234 | -1.702749 | -1.179933 |      |           |           |           |

**Table 2 - Optimized structure (Cartesian coordinates, Å) of (2a) –TTC-Sp-ox**

| ATOM | X         | Y         | Z         | ATOM | X        | Y         | Z         |
|------|-----------|-----------|-----------|------|----------|-----------|-----------|
| 1 C  | -7.077267 | -2.165374 | 0.576332  | 49 C | 4.668980 | -1.961314 | 0.159842  |
| 2 C  | -7.047412 | -2.139212 | -0.813346 | 50 H | 5.132998 | 1.044824  | 0.911356  |
| 3 C  | -6.020984 | -1.491365 | -1.499217 | 51 H | 4.587740 | 3.420476  | 0.455297  |
| 4 C  | -5.022300 | -0.874395 | -0.757720 | 52 O | 3.222510 | -0.324296 | -0.800019 |
| 5 C  | -5.044710 | -0.894531 | 0.637286  | 53 N | 3.163163 | -0.694301 | 1.537340  |
| 6 C  | -6.070121 | -1.534541 | 1.308839  | 54 C | 4.697192 | -1.509486 | -2.215891 |
| 7 C  | -3.878541 | -0.091835 | 1.167878  | 55 C | 5.656051 | -2.929862 | -0.012989 |
| 8 C  | -2.984422 | -0.024358 | -0.111755 | 56 C | 5.678409 | -2.477249 | -2.371563 |
| 9 N  | -3.919397 | -0.141074 | -1.237668 | 57 C | 6.167356 | -3.186216 | -1.273677 |
| 10 C | -3.151801 | -0.736514 | 2.340943  | 58 O | 4.310390 | -2.435870 | 2.451181  |
| 11 C | -4.379144 | 1.303324  | 1.566599  | 59 H | 4.309957 | -0.946783 | -3.057659 |
| 12 C | -3.119003 | -0.734105 | -2.300974 | 60 H | 6.072068 | -2.677477 | -3.362894 |
| 13 C | -2.143015 | 1.215062  | -0.239163 | 61 H | 6.936794 | -3.937854 | -1.409289 |
| 14 O | -1.457066 | 3.890211  | -0.904557 | 62 H | 5.991638 | -3.473781 | 0.863129  |
| 15 C | -0.809463 | 1.186518  | -0.132121 | 63 C | 2.594337 | -0.318005 | 2.820576  |
| 16 C | 0.142676  | 2.290238  | -0.220518 | 64 H | 2.978621 | 0.654515  | 3.146336  |
| 17 C | -0.171596 | 3.610081  | -0.603539 | 65 H | 1.507415 | -0.266996 | 2.754786  |
| 18 C | 0.807555  | 4.601509  | -0.678855 | 66 H | 2.890765 | -1.080954 | 3.537302  |
| 19 C | 2.120967  | 4.309455  | -0.369520 |      |          |           |           |
| 20 C | 2.487766  | 3.020077  | 0.013312  |      |          |           |           |
| 21 C | 1.492667  | 2.040804  | 0.075300  |      |          |           |           |
| 22 H | -7.883617 | -2.676674 | 1.091313  |      |          |           |           |
| 23 H | -7.833787 | -2.630764 | -1.377489 |      |          |           |           |
| 24 H | -6.010942 | -1.470804 | -2.584222 |      |          |           |           |
| 25 H | -6.090040 | -1.555707 | 2.394778  |      |          |           |           |
| 26 H | -2.811086 | -1.740459 | 2.088881  |      |          |           |           |
| 27 H | -2.282910 | -0.136892 | 2.630288  |      |          |           |           |
| 28 H | -3.819049 | -0.794596 | 3.206360  |      |          |           |           |
| 29 H | -5.104286 | 1.210044  | 2.379795  |      |          |           |           |
| 30 H | -3.553902 | 1.932326  | 1.913276  |      |          |           |           |
| 31 H | -4.874202 | 1.806117  | 0.731246  |      |          |           |           |
| 32 H | -2.593761 | 0.057206  | -2.841037 |      |          |           |           |
| 33 H | -3.744975 | -1.280042 | -3.007203 |      |          |           |           |
| 34 H | -2.683334 | 2.134200  | -0.418896 |      |          |           |           |
| 35 H | -0.358136 | 0.217092  | 0.052059  |      |          |           |           |
| 36 H | 2.878631  | 5.084918  | -0.420581 |      |          |           |           |
| 37 H | 0.522280  | 5.606176  | -0.978742 |      |          |           |           |
| 38 C | 3.832042  | 2.643343  | 0.382223  |      |          |           |           |
| 39 C | -2.134554 | -1.641275 | -1.538854 |      |          |           |           |
| 40 H | -1.114875 | -1.557369 | -1.928933 |      |          |           |           |
| 41 H | -2.440368 | -2.691516 | -1.565259 |      |          |           |           |
| 42 O | -2.183120 | -1.203427 | -0.186038 |      |          |           |           |
| 43 H | -1.526804 | 4.809220  | -1.183939 |      |          |           |           |
| 44 C | 4.136332  | 1.367428  | 0.632051  |      |          |           |           |
| 45 C | 3.098904  | 0.295980  | 0.477516  |      |          |           |           |
| 46 O | 1.792710  | 0.782032  | 0.503036  |      |          |           |           |
| 47 C | 4.201585  | -1.252288 | -0.942722 |      |          |           |           |
| 48 C | 4.059419  | -1.735233 | 1.485964  |      |          |           |           |

**Table 3 - Optimized structure (Cartesian coordinates, Å) of (2a) –TTC-TTC**

| ATOM | X         | Y         | Z         | ATOM | X         | Y         | Z         |
|------|-----------|-----------|-----------|------|-----------|-----------|-----------|
| 1 C  | 7.595105  | -3.271677 | -0.109876 | 49 C | 7.448192  | -1.041912 | 0.076541  |
| 2 C  | 8.385058  | -2.131870 | -0.208265 | 50 H | 2.634565  | -0.813114 | 0.110010  |
| 3 C  | 7.816265  | -0.860089 | -0.257402 | 51 H | 3.795796  | 2.024177  | -0.133316 |
| 4 C  | 6.432040  | -0.777273 | -0.207622 | 52 O | 5.657369  | 0.536303  | -0.032395 |
| 5 C  | 5.628493  | -1.908712 | -0.107305 | 53 N | 5.140075  | -1.736109 | 0.166158  |
| 6 C  | 6.203897  | -3.163307 | -0.058888 | 54 C | 7.866997  | 1.334534  | -0.132149 |
| 7 C  | 4.176284  | -1.488848 | -0.080730 | 55 C | 8.821535  | -1.287514 | 0.077444  |
| 8 C  | 4.295074  | 0.037883  | -0.161645 | 56 C | 9.227884  | 1.073407  | -0.129398 |
| 9 N  | 5.620158  | 0.361033  | -0.251408 | 57 C | 9.710218  | -0.233208 | -0.025082 |
| 10 C | 3.520039  | -1.944778 | 1.231349  | 58 O | 6.793965  | -3.302786 | 0.280482  |
| 11 C | 3.443822  | -2.067746 | -1.302273 | 59 H | 7.475596  | 2.341946  | -0.212524 |
| 12 C | 6.163518  | 1.697797  | -0.410357 | 60 H | 9.924793  | 1.900824  | -0.210003 |
| 13 C | 3.296645  | 0.986482  | -0.161214 | 61 H | 10.778119 | -0.418610 | -0.024661 |
| 14 O | 2.061779  | 3.563741  | -0.388686 | 62 H | 9.156879  | -2.315100 | 0.159817  |
| 15 C | 1.927205  | 0.675377  | -0.128199 | 63 C | 4.124558  | -2.777925 | 0.270064  |
| 16 C | 0.844030  | 1.528437  | -0.180430 | 64 H | 3.508354  | -2.615217 | 1.156509  |
| 17 C | 0.974959  | 2.986521  | -0.317193 | 65 H | 3.490911  | -2.775942 | -0.619052 |
| 18 C | -0.266246 | 3.754815  | -0.371746 | 66 H | 4.648104  | -3.726655 | 0.350435  |
| 19 C | -1.476081 | 3.166384  | -0.305669 |      |           |           |           |
| 20 C | -1.673046 | 1.744477  | -0.178572 |      |           |           |           |
| 21 C | -0.477955 | 0.873239  | -0.113218 |      |           |           |           |
| 22 H | 8.062019  | -4.249678 | -0.071267 |      |           |           |           |
| 23 H | 9.465064  | -2.228193 | -0.244822 |      |           |           |           |
| 24 H | 8.443703  | 0.020950  | -0.328012 |      |           |           |           |
| 25 H | 5.588572  | -4.054971 | 0.015978  |      |           |           |           |
| 26 H | 4.041727  | -1.525286 | 2.095322  |      |           |           |           |
| 27 H | 2.471076  | -1.648892 | 1.285045  |      |           |           |           |
| 28 H | 3.569956  | -3.034972 | 1.303240  |      |           |           |           |
| 29 H | 3.509185  | -3.159286 | -1.280185 |      |           |           |           |
| 30 H | 2.388605  | -1.789692 | -1.310165 |      |           |           |           |
| 31 H | 3.899849  | -1.718680 | -2.231835 |      |           |           |           |
| 32 H | 5.421871  | 2.317229  | -0.918310 |      |           |           |           |
| 33 H | 7.036033  | 1.627083  | -1.067856 |      |           |           |           |
| 34 H | 3.558876  | 2.036300  | -0.182428 |      |           |           |           |
| 35 H | 1.629103  | -0.366001 | -0.055351 |      |           |           |           |
| 36 H | -2.372054 | 3.782537  | -0.350429 |      |           |           |           |
| 37 H | -0.157796 | 4.829650  | -0.469715 |      |           |           |           |
| 38 C | -2.960952 | 1.269709  | -0.126513 |      |           |           |           |
| 39 C | 6.566588  | 2.339490  | 0.911311  |      |           |           |           |
| 40 H | 7.063118  | 3.288556  | 0.690640  |      |           |           |           |
| 41 H | 7.294665  | 1.695817  | 1.426560  |      |           |           |           |
| 42 O | 5.472339  | 2.646371  | 1.739191  |      |           |           |           |
| 43 H | 5.030814  | 1.828387  | 1.981504  |      |           |           |           |
| 44 C | -3.390687 | -0.073796 | -0.009941 |      |           |           |           |
| 45 C | -4.711941 | -0.415389 | 0.029541  |      |           |           |           |
| 46 O | -0.578432 | -0.352182 | -0.006209 |      |           |           |           |
| 47 C | -6.963539 | 0.324928  | -0.011658 |      |           |           |           |
| 48 C | -6.500554 | -2.087608 | 0.179846  |      |           |           |           |

**Table 4 - Optimized structure (Cartesian coordinates, Å) of (2a) –TTC-TTC-ox**

| ATOM | X         | Y         | Z         | ATOM | X        | Y         | Z         |
|------|-----------|-----------|-----------|------|----------|-----------|-----------|
| 1 C  | -7.077267 | -2.165374 | 0.576332  | 49 C | 4.668980 | -1.961314 | 0.159842  |
| 2 C  | -7.047412 | -2.139212 | -0.813346 | 50 H | 5.132998 | 1.044824  | 0.911356  |
| 3 C  | -6.020984 | -1.491365 | -1.499217 | 51 H | 4.587740 | 3.420476  | 0.455297  |
| 4 C  | -5.022300 | -0.874395 | -0.757720 | 52 O | 3.222510 | -0.324296 | -0.800019 |
| 5 C  | -5.044710 | -0.894531 | 0.637286  | 53 N | 3.163163 | -0.694301 | 1.537340  |
| 6 C  | -6.070121 | -1.534541 | 1.308839  | 54 C | 4.697192 | -1.509486 | -2.215891 |
| 7 C  | -3.878541 | -0.091835 | 1.167878  | 55 C | 5.656051 | -2.929862 | -0.012989 |
| 8 C  | -2.984422 | -0.024358 | -0.111755 | 56 C | 5.678409 | -2.477249 | -2.371563 |
| 9 N  | -3.919397 | -0.141074 | -1.237668 | 57 C | 6.167356 | -3.186216 | -1.273677 |
| 10 C | -3.151801 | -0.736514 | 2.340943  | 58 O | 4.310390 | -2.435870 | 2.451181  |
| 11 C | -4.379144 | 1.303324  | 1.566599  | 59 H | 4.309957 | -0.946783 | -3.057659 |
| 12 C | -3.119003 | -0.734105 | -2.300974 | 60 H | 6.072068 | -2.677477 | -3.362894 |
| 13 C | -2.143015 | 1.215062  | -0.239163 | 61 H | 6.936794 | -3.937854 | -1.409289 |
| 14 O | -1.457066 | 3.890211  | -0.904557 | 62 H | 5.991638 | -3.473781 | 0.863129  |
| 15 C | -0.809463 | 1.186518  | -0.132121 | 63 C | 2.594337 | -0.318005 | 2.820576  |
| 16 C | 0.142676  | 2.290238  | -0.220518 | 64 H | 2.978621 | 0.654515  | 3.146336  |
| 17 C | -0.171596 | 3.610081  | -0.603539 | 65 H | 1.507415 | -0.266996 | 2.754786  |
| 18 C | 0.807555  | 4.601509  | -0.678855 | 66 H | 2.890765 | -1.080954 | 3.537302  |
| 19 C | 2.120967  | 4.309455  | -0.369520 |      |          |           |           |
| 20 C | 2.487766  | 3.020077  | 0.013312  |      |          |           |           |
| 21 C | 1.492667  | 2.040804  | 0.075300  |      |          |           |           |
| 22 H | -7.883617 | -2.676674 | 1.091313  |      |          |           |           |
| 23 H | -7.833787 | -2.630764 | -1.377489 |      |          |           |           |
| 24 H | -6.010942 | -1.470804 | -2.584222 |      |          |           |           |
| 25 H | -6.090040 | -1.555707 | 2.394778  |      |          |           |           |
| 26 H | -2.811086 | -1.740459 | 2.088881  |      |          |           |           |
| 27 H | -2.282910 | -0.136892 | 2.630288  |      |          |           |           |
| 28 H | -3.819049 | -0.794596 | 3.206360  |      |          |           |           |
| 29 H | -5.104286 | 1.210044  | 2.379795  |      |          |           |           |
| 30 H | -3.553902 | 1.932326  | 1.913276  |      |          |           |           |
| 31 H | -4.874202 | 1.806117  | 0.731246  |      |          |           |           |
| 32 H | -2.593761 | 0.057206  | -2.841037 |      |          |           |           |
| 33 H | -3.744975 | -1.280042 | -3.007203 |      |          |           |           |
| 34 H | -2.683334 | 2.134200  | -0.418896 |      |          |           |           |
| 35 H | -0.358136 | 0.217092  | 0.052059  |      |          |           |           |
| 36 H | 2.878631  | 5.084918  | -0.420581 |      |          |           |           |
| 37 H | 0.522280  | 5.606176  | -0.978742 |      |          |           |           |
| 38 C | 3.832042  | 2.643343  | 0.382223  |      |          |           |           |
| 39 C | -2.134554 | -1.641275 | -1.538854 |      |          |           |           |
| 40 H | -1.114875 | -1.557369 | -1.928933 |      |          |           |           |
| 41 H | -2.440368 | -2.691516 | -1.565259 |      |          |           |           |
| 42 O | -2.183120 | -1.203427 | -0.186038 |      |          |           |           |
| 43 H | -1.526804 | 4.809220  | -1.183939 |      |          |           |           |
| 44 C | 4.136332  | 1.367428  | 0.632051  |      |          |           |           |
| 45 C | 3.098904  | 0.295980  | 0.477516  |      |          |           |           |
| 46 O | 1.792710  | 0.782032  | 0.503036  |      |          |           |           |
| 47 C | 4.201585  | -1.252288 | -0.942722 |      |          |           |           |
| 48 C | 4.059419  | -1.735233 | 1.485964  |      |          |           |           |

**Table 5 - Optimized structure (Cartesian coordinates, Å) of (2b)**

| ATOM | X         | Y         | Z         | ATOM | X         | Y         | Z         |
|------|-----------|-----------|-----------|------|-----------|-----------|-----------|
| 1 C  | 6.640008  | -2.781086 | 0.521440  | 49 H | -2.996278 | 1.206715  | 3.565697  |
| 2 C  | 7.186364  | -1.620772 | -0.009827 | 50 O | -3.857263 | -0.913402 | 0.021140  |
| 3 C  | 6.378271  | -0.616508 | -0.548688 | 51 N | -4.294404 | 1.296716  | -0.706024 |
| 4 C  | 5.003401  | -0.814599 | -0.536559 | 52 C | -5.563828 | -2.541268 | 0.165176  |
| 5 C  | 4.446448  | -1.990904 | -0.029809 | 53 C | -7.408615 | -0.681314 | -0.799309 |
| 6 C  | 5.254322  | -2.973438 | 0.502994  | 54 C | -6.892566 | -2.893839 | -0.019764 |
| 7 C  | 2.961117  | -1.978253 | -0.307070 | 55 C | -7.821349 | -1.967184 | -0.495187 |
| 8 C  | 2.716003  | -0.447885 | -0.585922 | 56 O | -6.318012 | 1.829852  | -1.601997 |
| 9 N  | 3.997805  | 0.019180  | -1.011548 | 57 H | -4.831168 | -3.248232 | 0.538174  |
| 10 C | 2.106079  | -2.543451 | 0.818972  | 58 H | -7.209540 | -3.904757 | 0.215755  |
| 11 C | 2.713480  | -2.783196 | -1.593180 | 59 H | -8.857837 | -2.255077 | -0.630394 |
| 12 C | 4.267875  | 1.308491  | -1.602265 | 60 H | -8.095862 | 0.060929  | -1.190186 |
| 13 C | 1.618579  | -0.151498 | -1.561353 | 61 C | -3.767841 | 2.630922  | -0.944337 |
| 14 O | 2.431566  | 0.239055  | 0.699576  | 62 H | -3.543040 | 3.133190  | 0.002273  |
| 15 C | 0.387557  | 0.185486  | -1.168296 | 63 H | -2.861225 | 2.583428  | -1.548187 |
| 16 C | 0.084158  | 0.353930  | 0.238873  | 64 H | -4.536254 | 3.190114  | -1.473709 |
| 17 C | 1.148767  | 0.371656  | 1.145281  | 65 C | 3.941751  | 3.403880  | -0.121043 |
| 18 C | 0.952888  | 0.595775  | 2.502335  | 66 O | 4.051289  | 4.585502  | -0.327072 |
| 19 C | -0.336687 | 0.781324  | 2.970872  | 67 O | 2.941960  | 2.946117  | 0.637753  |
| 20 C | -1.433740 | 0.751246  | 2.106539  | 68 H | 2.956782  | 1.972816  | 0.697019  |
| 21 C | -1.201988 | 0.541360  | 0.745336  |      |           |           |           |
| 22 H | 7.287590  | -3.541839 | 0.943750  |      |           |           |           |
| 23 H | 8.262830  | -1.481585 | -0.003019 |      |           |           |           |
| 24 H | 6.823553  | 0.282751  | -0.959420 |      |           |           |           |
| 25 H | 4.824768  | -3.891546 | 0.893674  |      |           |           |           |
| 26 H | 2.304259  | -2.046829 | 1.769609  |      |           |           |           |
| 27 H | 1.040347  | -2.456891 | 0.588642  |      |           |           |           |
| 28 H | 2.328369  | -3.607665 | 0.938791  |      |           |           |           |
| 29 H | 3.019579  | -3.819392 | -1.428964 |      |           |           |           |
| 30 H | 1.653817  | -2.777667 | -1.864894 |      |           |           |           |
| 31 H | 3.293794  | -2.387689 | -2.431270 |      |           |           |           |
| 32 H | 3.336645  | 1.680203  | -2.039071 |      |           |           |           |
| 33 H | 4.957419  | 1.156523  | -2.440024 |      |           |           |           |
| 34 H | 1.856550  | -0.276885 | -2.611918 |      |           |           |           |
| 35 H | -0.402817 | 0.341948  | -1.893694 |      |           |           |           |
| 36 H | -0.507533 | 0.948152  | 4.029931  |      |           |           |           |
| 37 H | 1.806956  | 0.613197  | 3.169617  |      |           |           |           |
| 38 C | -2.800668 | 0.957099  | 2.526517  |      |           |           |           |
| 39 C | 4.897421  | 2.370438  | -0.665316 |      |           |           |           |
| 40 H | 5.670421  | 2.919562  | -1.204623 |      |           |           |           |
| 41 H | 5.381741  | 1.867899  | 0.179212  |      |           |           |           |
| 42 C | -3.802626 | 0.842095  | 1.651209  |      |           |           |           |
| 43 C | -3.550752 | 0.461932  | 0.223212  |      |           |           |           |
| 44 O | -2.213003 | 0.571406  | -0.164296 |      |           |           |           |
| 45 C | -5.165374 | -1.243333 | -0.132516 |      |           |           |           |
| 46 C | -5.605459 | 1.030008  | -1.017218 |      |           |           |           |
| 47 C | -6.076187 | -0.311611 | -0.621283 |      |           |           |           |
| 48 H | -4.840822 | 0.986101  | 1.930504  |      |           |           |           |

**Table 6 - Optimized structure (Cartesian coordinates, Å) of (2b)–TTC-SP**

| ATOM | X         | Y         | Z         | ATOM | X         | Y         | Z         |
|------|-----------|-----------|-----------|------|-----------|-----------|-----------|
| 1 C  | 5.102407  | -4.072412 | -0.682570 | 49 H | -4.708103 | 3.519531  | -0.851382 |
| 2 C  | 6.149822  | -3.158066 | -0.643282 | 50 O | -3.321436 | -0.009259 | 0.917495  |
| 3 C  | 5.910026  | -1.788051 | -0.554486 | 51 N | -3.641084 | -0.820332 | -1.285459 |
| 4 C  | 4.585648  | -1.376440 | -0.503278 | 52 C | -4.584797 | -0.818175 | 2.743460  |
| 5 C  | 3.529205  | -2.276661 | -0.564081 | 53 C | -5.890138 | -2.599556 | 1.037314  |
| 6 C  | 3.778227  | -3.633207 | -0.649253 | 54 C | -5.545663 | -1.690234 | 3.233242  |
| 7 C  | 2.226664  | -1.513847 | -0.557128 | 55 C | -6.207251 | -2.579117 | 2.384682  |
| 8 C  | 2.718402  | -0.064574 | -0.483311 | 56 O | -4.936221 | -2.656708 | -1.648641 |
| 9 N  | 4.071574  | -0.072038 | -0.418163 | 57 H | -4.066297 | -0.118617 | 3.389619  |
| 10 C | 1.400079  | -1.887693 | 0.684868  | 58 H | -5.787257 | -1.671940 | 4.291227  |
| 11 C | 1.459936  | -1.804906 | -1.857288 | 59 H | -6.959493 | -3.252343 | 2.780259  |
| 12 C | 4.951110  | 1.082468  | -0.330482 | 60 H | -6.367418 | -3.288632 | 0.349184  |
| 13 C | 1.966573  | 1.102294  | -0.495839 | 61 C | -3.307692 | -0.705577 | -2.695661 |
| 14 O | 1.449562  | 3.910323  | -0.560161 | 62 H | -3.731734 | 0.210774  | -3.119301 |
| 15 C | 0.580165  | 1.122698  | -0.566841 | 63 H | -2.226331 | -0.690688 | -2.834216 |
| 16 C | -0.259072 | 2.243527  | -0.603054 | 64 H | -3.735002 | -1.569358 | -3.200187 |
| 17 C | 0.240231  | 3.631458  | -0.576682 | 65 C | 4.821250  | 1.463905  | 2.183731  |
| 18 C | -0.768379 | 4.673845  | -0.567452 | 66 O | 3.646395  | 1.699711  | 2.121483  |
| 19 C | -2.095672 | 4.394282  | -0.602231 | 67 O | 5.441767  | 1.456110  | 3.372894  |
| 20 C | -2.588528 | 3.057588  | -0.646055 | 68 H | 6.383712  | 1.254881  | 3.281204  |
| 21 C | -1.667797 | 2.032599  | -0.652081 |      |           |           |           |
| 22 H | 5.316453  | -5.133584 | -0.748537 |      |           |           |           |
| 23 H | 7.174495  | -3.511946 | -0.684154 |      |           |           |           |
| 24 H | 6.736983  | -1.087425 | -0.541684 |      |           |           |           |
| 25 H | 2.962539  | -4.348502 | -0.696400 |      |           |           |           |
| 26 H | 1.953238  | -1.667626 | 1.601060  |      |           |           |           |
| 27 H | 0.451186  | -1.349458 | 0.719855  |      |           |           |           |
| 28 H | 1.183242  | -2.959201 | 0.664110  |      |           |           |           |
| 29 H | 1.241486  | -2.874632 | -1.914797 |      |           |           |           |
| 30 H | 0.514200  | -1.263523 | -1.903752 |      |           |           |           |
| 31 H | 2.056014  | -1.531487 | -2.731262 |      |           |           |           |
| 32 H | 4.364333  | 1.984388  | -0.489007 |      |           |           |           |
| 33 H | 5.674403  | 1.014912  | -1.150431 |      |           |           |           |
| 34 H | 2.460014  | 2.060306  | -0.423541 |      |           |           |           |
| 35 H | 0.054625  | 0.176413  | -0.583134 |      |           |           |           |
| 36 H | -2.823040 | 5.202742  | -0.601887 |      |           |           |           |
| 37 H | -0.404527 | 5.695461  | -0.538531 |      |           |           |           |
| 38 C | -3.982699 | 2.718414  | -0.734269 |      |           |           |           |
| 39 C | 5.701856  | 1.174759  | 0.991392  |      |           |           |           |
| 40 H | 6.439092  | 1.984212  | 0.913655  |      |           |           |           |
| 41 H | 6.277924  | 0.265317  | 1.192229  |      |           |           |           |
| 42 C | -4.383943 | 1.440639  | -0.684329 |      |           |           |           |
| 43 C | -3.382931 | 0.353093  | -0.464914 |      |           |           |           |
| 44 O | -2.073809 | 0.735695  | -0.766519 |      |           |           |           |
| 45 C | -4.283781 | -0.840265 | 1.385966  |      |           |           |           |
| 46 C | -4.526678 | -1.791633 | -0.889889 |      |           |           |           |
| 47 C | -4.925573 | -1.730368 | 0.529639  |      |           |           |           |
| 48 H | -5.424291 | 1.144912  | -0.756276 |      |           |           |           |

**Table 7 - Optimized structure (Cartesian coordinates, Å) of (2b)–TTC-TTC**

| ATOM | X         | Y         | Z         | ATOM | X         | Y         | Z         |
|------|-----------|-----------|-----------|------|-----------|-----------|-----------|
| 1 C  | -7.153113 | 3.625011  | -0.313172 | 49 H | 4.017971  | -1.908319 | -0.542994 |
| 2 C  | -7.987509 | 2.519239  | -0.433809 | 50 O | 5.909451  | -0.573024 | -0.121196 |
| 3 C  | -7.470212 | 1.225381  | -0.484063 | 51 N | 5.505066  | 1.679320  | 0.380815  |
| 4 C  | -6.091390 | 1.086233  | -0.404281 | 52 C | 8.072868  | -1.489309 | -0.190424 |
| 5 C  | -5.244835 | 2.182924  | -0.291874 | 53 C | 9.150007  | 1.006396  | 0.471441  |
| 6 C  | -5.768365 | 3.460324  | -0.242900 | 54 C | 9.441961  | -1.320805 | -0.057628 |
| 7 C  | -3.812378 | 1.704515  | -0.263452 | 55 C | 9.985696  | -0.077259 | 0.272837  |
| 8 C  | -3.988771 | 0.184734  | -0.388936 | 56 O | 7.228570  | 3.102307  | 0.829008  |
| 9 N  | -5.326084 | -0.086217 | -0.437287 | 57 H | 7.634854  | -2.447540 | -0.445879 |
| 10 C | -3.158325 | 2.094038  | 1.072033  | 58 H | 10.096540 | -2.171835 | -0.213840 |
| 11 C | -3.047906 | 2.299556  | -1.457073 | 59 H | 11.059106 | 0.036430  | 0.372725  |
| 12 C | -5.956000 | -1.388792 | -0.562225 | 60 H | 9.535800  | 1.986354  | 0.728712  |
| 13 C | -3.013637 | -0.786989 | -0.474166 | 61 C | 4.543177  | 2.756984  | 0.569696  |
| 14 O | -1.792603 | -3.332536 | -1.087688 | 62 H | 3.970863  | 2.916177  | -0.346792 |
| 15 C | -1.641920 | -0.504081 | -0.429010 | 63 H | 3.861822  | 2.515547  | 1.388504  |
| 16 C | -0.561852 | -1.357073 | -0.581228 | 64 H | 5.107923  | 3.652865  | 0.812564  |
| 17 C | -0.701293 | -2.779204 | -0.914887 | 65 C | -5.734458 | -2.351018 | 1.772991  |
| 18 C | 0.532863  | -3.547169 | -1.052014 | 66 O | -4.651786 | -2.814691 | 1.541350  |
| 19 C | 1.747418  | -2.986753 | -0.886777 | 67 O | -6.194593 | -2.314515 | 3.031387  |
| 20 C | 1.951303  | -1.597946 | -0.565975 | 68 H | -7.072718 | -1.909976 | 3.071851  |
| 21 C | 0.763010  | -0.729677 | -0.416467 |      |           |           |           |
| 22 H | -7.580309 | 4.621207  | -0.275772 |      |           |           |           |
| 23 H | -9.061665 | 2.659870  | -0.493621 |      |           |           |           |
| 24 H | -8.132896 | 0.373704  | -0.588708 |      |           |           |           |
| 25 H | -5.118243 | 4.326066  | -0.157313 |      |           |           |           |
| 26 H | -3.701300 | 1.657918  | 1.914272  |      |           |           |           |
| 27 H | -2.117936 | 1.768827  | 1.127026  |      |           |           |           |
| 28 H | -3.181228 | 3.182098  | 1.180575  |      |           |           |           |
| 29 H | -3.074808 | 3.391082  | -1.395634 |      |           |           |           |
| 30 H | -2.003140 | 1.985286  | -1.467296 |      |           |           |           |
| 31 H | -3.507503 | 2.000437  | -2.402270 |      |           |           |           |
| 32 H | -5.199565 | -2.126291 | -0.824465 |      |           |           |           |
| 33 H | -6.670219 | -1.338736 | -1.390309 |      |           |           |           |
| 34 H | -3.302113 | -1.824824 | -0.563344 |      |           |           |           |
| 35 H | -1.329612 | 0.517863  | -0.240248 |      |           |           |           |
| 36 H | 2.639224  | -3.600642 | -0.998324 |      |           |           |           |
| 37 H | 0.419113  | -4.597807 | -1.298053 |      |           |           |           |
| 38 C | 3.243960  | -1.155579 | -0.406715 |      |           |           |           |
| 39 C | -6.673459 | -1.826780 | 0.707631  |      |           |           |           |
| 40 H | -7.351106 | -2.654512 | 0.459404  |      |           |           |           |
| 41 H | -7.302780 | -1.025653 | 1.107131  |      |           |           |           |
| 42 C | 3.695439  | 0.144281  | -0.082519 |      |           |           |           |
| 43 C | 5.026110  | 0.428255  | 0.061068  |      |           |           |           |
| 44 O | 0.874962  | 0.474929  | -0.159474 |      |           |           |           |
| 45 C | 7.249842  | -0.389844 | 0.013060  |      |           |           |           |
| 46 C | 6.858804  | 1.982883  | 0.543203  |      |           |           |           |
| 47 C | 7.769045  | 0.854322  | 0.341313  |      |           |           |           |
| 48 H | 2.962545  | 0.922114  | 0.056227  |      |           |           |           |



**Table 8 - Optimized structure (Cartesian coordinates, Å) of (2b)–TTC-Sp-Zn<sup>++</sup>**

| ATOM | X         | Y         | Z         | ATOM  | X         | Y         | Z         |
|------|-----------|-----------|-----------|-------|-----------|-----------|-----------|
| 1 C  | -3.869992 | 4.933674  | 0.027749  | 49 H  | 4.670465  | -3.761698 | -0.684620 |
| 2 C  | -4.985618 | 4.334467  | -0.552107 | 50 O  | 3.613833  | -0.006982 | 0.825959  |
| 3 C  | -4.987516 | 2.982149  | -0.880457 | 51 N  | 3.885825  | 0.592296  | -1.446614 |
| 4 C  | -3.834987 | 2.269800  | -0.589005 | 52 C  | 4.972040  | 0.900777  | 2.534561  |
| 5 C  | -2.708229 | 2.853463  | -0.035246 | 53 C  | 6.280202  | 2.483164  | 0.640792  |
| 6 C  | -2.713970 | 4.199357  | 0.282392  | 54 C  | 5.980768  | 1.773371  | 2.916664  |
| 7 C  | -1.610529 | 1.826621  | 0.059683  | 55 C  | 6.641957  | 2.562198  | 1.974546  |
| 8 C  | -2.319276 | 0.580145  | -0.467381 | 56 O  | 5.247337  | 2.323913  | -2.016504 |
| 9 N  | -3.565074 | 0.891927  | -0.803083 | 57 H  | 4.451811  | 0.277811  | 3.253469  |
| 10 C | -1.141538 | 1.660344  | 1.514936  | 58 H  | 6.259416  | 1.834108  | 3.963685  |
| 11 C | -0.463288 | 2.263321  | -0.878244 | 59 H  | 7.431070  | 3.236640  | 2.287251  |
| 12 C | -4.608640 | 0.001782  | -1.309765 | 60 H  | 6.759499  | 3.092297  | -0.117550 |
| 13 C | -1.763906 | -0.732838 | -0.593637 | 61 C  | 3.520719  | 0.350575  | -2.835031 |
| 14 O | -1.486247 | -3.630789 | 0.063460  | 62 H  | 3.901693  | -0.618230 | -3.174278 |
| 15 C | -0.396863 | -0.952963 | -0.349665 | 63 H  | 2.437246  | 0.369562  | -2.956752 |
| 16 C | 0.340389  | -2.140171 | -0.387032 | 64 H  | 3.972284  | 1.142543  | -3.428206 |
| 17 C | -0.224223 | -3.450133 | -0.150905 | 65 C  | -5.360339 | -0.907806 | 0.943336  |
| 18 C | 0.646351  | -4.555409 | -0.093573 | 66 O  | -4.383109 | -1.653500 | 1.005779  |
| 19 C | 2.000058  | -4.389063 | -0.242726 | 67 O  | -6.096864 | -0.802984 | 2.002213  |
| 20 C | 2.594853  | -3.121774 | -0.425263 | 68 H  | -6.863925 | -0.213691 | 1.881693  |
| 21 C | 1.761430  | -2.026451 | -0.481707 | 69 Zn | -2.687368 | -2.338974 | 0.618842  |
| 22 H | -3.898123 | 5.989437  | 0.273804  |       |           |           |           |
| 23 H | -5.868641 | 4.928273  | -0.760095 |       |           |           |           |
| 24 H | -5.852991 | 2.535235  | -1.356713 |       |           |           |           |
| 25 H | -1.842359 | 4.679554  | 0.715803  |       |           |           |           |
| 26 H | -1.966248 | 1.364245  | 2.168479  |       |           |           |           |
| 27 H | -0.339114 | 0.927075  | 1.615691  |       |           |           |           |
| 28 H | -0.760313 | 2.620251  | 1.871221  |       |           |           |           |
| 29 H | -0.140918 | 3.262722  | -0.577774 |       |           |           |           |
| 30 H | 0.409503  | 1.611351  | -0.828015 |       |           |           |           |
| 31 H | -0.801882 | 2.314065  | -1.915750 |       |           |           |           |
| 32 H | -4.173188 | -0.955473 | -1.596862 |       |           |           |           |
| 33 H | -5.009604 | 0.445568  | -2.226480 |       |           |           |           |
| 34 H | -2.229408 | -1.386755 | -1.348345 |       |           |           |           |
| 35 H | 0.202310  | -0.088913 | -0.094355 |       |           |           |           |
| 36 H | 2.649299  | -5.259877 | -0.212768 |       |           |           |           |
| 37 H | 0.211360  | -5.532296 | 0.079841  |       |           |           |           |
| 38 C | 4.011615  | -2.901972 | -0.604003 |       |           |           |           |
| 39 C | -5.743385 | -0.183530 | -0.308283 |       |           |           |           |
| 40 H | -6.521632 | -0.796668 | -0.787696 |       |           |           |           |
| 41 H | -6.226985 | 0.761894  | -0.047727 |       |           |           |           |
| 42 C | 4.493306  | -1.658180 | -0.675579 |       |           |           |           |
| 43 C | 3.593320  | -0.470387 | -0.510737 |       |           |           |           |
| 44 O | 2.229921  | -0.785525 | -0.723711 |       |           |           |           |
| 45 C | 4.628133  | 0.825503  | 1.191595  |       |           |           |           |
| 46 C | 4.827759  | 1.559998  | -1.165866 |       |           |           |           |
| 47 C | 5.267438  | 1.612451  | 0.240544  |       |           |           |           |
| 48 H | 5.547974  | -1.447336 | -0.815427 |       |           |           |           |

**Table 9 - Optimized structure (Cartesian coordinates, Å) of (2b) –TTC-TTC-Zn<sup>++</sup>**

| ATOM | X         | Y         | Z         | ATOM  | X         | Y         | Z         |
|------|-----------|-----------|-----------|-------|-----------|-----------|-----------|
| 1 C  | -6.517043 | 4.075577  | 0.561382  | 49 H  | 4.334983  | -1.887216 | 0.014006  |
| 2 C  | -7.322184 | 3.295937  | -0.263188 | 50 O  | 6.285850  | -0.570473 | 0.003402  |
| 3 C  | -6.851405 | 2.105439  | -0.812481 | 51 N  | 5.974685  | 1.730706  | -0.027704 |
| 4 C  | -5.555522 | 1.736849  | -0.491667 | 52 C  | 8.409141  | -1.585123 | 0.023599  |
| 5 C  | -4.728904 | 2.517777  | 0.299577  | 53 C  | 9.612044  | 0.946342  | -0.001833 |
| 6 C  | -5.204838 | 3.697463  | 0.840746  | 54 C  | 9.788614  | -1.453856 | 0.026646  |
| 7 C  | -3.352745 | 1.902971  | 0.339723  | 55 C  | 10.392855 | -0.193890 | 0.014048  |
| 8 C  | -3.569057 | 0.622195  | -0.464380 | 56 O  | 7.762111  | 3.151595  | -0.033283 |
| 9 N  | -4.830061 | 0.587140  | -0.901699 | 57 H  | 7.923287  | -2.554181 | 0.033052  |
| 10 C | -2.900280 | 1.606720  | 1.775986  | 58 H  | 10.404131 | -2.347025 | 0.038838  |
| 11 C | -2.382048 | 2.865736  | -0.380725 | 59 H  | 11.473770 | -0.112439 | 0.016583  |
| 12 C | -5.464474 | -0.486969 | -1.656358 | 60 H  | 10.049023 | 1.938338  | -0.012066 |
| 13 C | -2.629715 | -0.420355 | -0.668000 | 61 C  | 5.060170  | 2.871092  | -0.046963 |
| 14 O | -1.573200 | -3.132565 | 0.019754  | 62 H  | 4.441441  | 2.840604  | -0.945628 |
| 15 C | -1.234168 | -0.237045 | -0.331277 | 63 H  | 4.429916  | 2.861285  | 0.844101  |
| 16 C | -0.228652 | -1.149857 | -0.199398 | 64 H  | 5.672263  | 3.768622  | -0.053503 |
| 17 C | -0.413059 | -2.591001 | -0.070872 | 65 C  | -6.187038 | -1.886281 | 0.377871  |
| 18 C | 0.724545  | -3.415189 | -0.000405 | 66 O  | -5.030852 | -2.167839 | 0.693635  |
| 19 C | 1.985439  | -2.871818 | -0.000760 | 67 O  | -7.119876 | -2.250155 | 1.203750  |
| 20 C | 2.267487  | -1.488242 | -0.034301 | 68 H  | -8.014020 | -2.006096 | 0.904858  |
| 21 C | 1.145220  | -0.550697 | -0.092644 | 69 Zn | -3.186141 | -2.212014 | 0.255617  |
| 22 H | -6.910479 | 4.995299  | 0.980038  |       |           |           |           |
| 23 H | -8.332769 | 3.617054  | -0.489958 |       |           |           |           |
| 24 H | -7.480215 | 1.523528  | -1.477092 |       |           |           |           |
| 25 H | -4.573668 | 4.324050  | 1.463380  |       |           |           |           |
| 26 H | -3.603432 | 0.942914  | 2.286303  |       |           |           |           |
| 27 H | -1.906164 | 1.155247  | 1.804642  |       |           |           |           |
| 28 H | -2.856830 | 2.544117  | 2.335729  |       |           |           |           |
| 29 H | -2.458344 | 3.845428  | 0.096105  |       |           |           |           |
| 30 H | -1.339609 | 2.554324  | -0.314380 |       |           |           |           |
| 31 H | -2.649407 | 2.980707  | -1.433780 |       |           |           |           |
| 32 H | -4.707700 | -1.198623 | -1.988168 |       |           |           |           |
| 33 H | -5.892039 | -0.057133 | -2.568446 |       |           |           |           |
| 34 H | -2.781206 | -1.023990 | -1.582364 |       |           |           |           |
| 35 H | -0.877256 | 0.777765  | -0.189038 |       |           |           |           |
| 36 H | 2.833776  | -3.551003 | 0.049921  |       |           |           |           |
| 37 H | 0.572334  | -4.484711 | 0.079147  |       |           |           |           |
| 38 C | 3.604774  | -1.080972 | -0.010949 |       |           |           |           |
| 39 C | -6.580347 | -1.186191 | -0.885962 |       |           |           |           |
| 40 H | -7.013510 | -1.955912 | -1.542133 |       |           |           |           |
| 41 H | -7.404012 | -0.504449 | -0.654717 |       |           |           |           |
| 42 C | 4.096432  | 0.216272  | -0.022780 |       |           |           |           |
| 43 C | 5.463451  | 0.474293  | -0.015480 |       |           |           |           |
| 44 O | 1.287651  | 0.667625  | -0.080177 |       |           |           |           |
| 45 C | 7.644912  | -0.429098 | 0.007376  |       |           |           |           |
| 46 C | 7.362631  | 2.012741  | -0.023418 |       |           |           |           |
| 47 C | 8.220430  | 0.832763  | -0.005541 |       |           |           |           |
| 48 H | 3.404135  | 1.042004  | -0.040182 |       |           |           |           |

# Data of NMR $^1\text{H}$ and IR-spectroscopy for compounds (2a,b, c)

## NMR $^1\text{H}$ data for (2a-c)

| Structure                                                                                       | NMR $^1\text{H}$ data ( $\text{CDCl}_3$ ), $\delta$ , ppm, $J(\text{Hz})$                                                                                                                                                                                                                                                                                                                                                                                                                                                                                                                                                                                                                                                                                                                                                                                                                                                                                                                                  |
|-------------------------------------------------------------------------------------------------|------------------------------------------------------------------------------------------------------------------------------------------------------------------------------------------------------------------------------------------------------------------------------------------------------------------------------------------------------------------------------------------------------------------------------------------------------------------------------------------------------------------------------------------------------------------------------------------------------------------------------------------------------------------------------------------------------------------------------------------------------------------------------------------------------------------------------------------------------------------------------------------------------------------------------------------------------------------------------------------------------------|
| 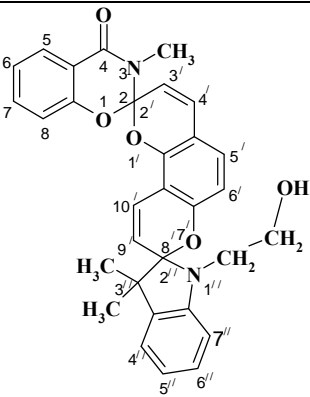 <p>(2a)</p>   | <p>1,07 and 1,24 (6H, 2s., hem. (<math>\text{CH}_3</math>)<sub>2</sub>); 3,16 (3H, d., <math>J = 1,9</math>; -N-<math>\text{CH}_3</math>); 3,36 (2H, m., N-<math>\text{CH}_2\text{-CH}_2\text{-OH}</math>); 3,7 (2H, m., N-<math>\text{CH}_2\text{-CH}_2\text{-OH}</math>); 5,50 (1H, dd., <math>J = 7,9</math>; 10,4; 9'-<math>\text{H}</math>); 5,88 (1H, d., <math>J = 9,8</math>; 3'-<math>\text{H}</math>); 6,39 (1H, d., <math>J = 8,5</math>; 6'-<math>\text{H}</math>); 6,55 – 6,76 (2H, m., 7''-<math>\text{H}</math>, 10'-<math>\text{H}</math>); 6,78 – 6,94 (3H, m., 8-<math>\text{H}</math>, 4'-<math>\text{H}</math>, 5''-<math>\text{H}</math>); 6,98 (1H, d., <math>J = 8,2</math>; 5'-<math>\text{H}</math>); 7,05 (1H, d., <math>J = 7,3</math>; 4''-<math>\text{H}</math>); 7,09 – 7,23 (2H, m., 6-<math>\text{H}</math>, 6''-<math>\text{H}</math>); 7,49 (1H, m., 7-<math>\text{H}</math>); 8,08 (1H, d., <math>J = 7,9</math>; 5-<math>\text{H}</math>).</p> <p>(Figure 1 and 2)</p> |
|  <p>(2b)</p>  | <p>1,06 и 1,22 (6H, 2s., hem. (<math>\text{CH}_3</math>)<sub>2</sub>); 2,6 (2H, m., N-<math>\text{CH}_2\text{-CH}_2\text{-}</math>); 3,19 (3H, d., <math>J = 4,4</math>; -N-<math>\text{CH}_3</math>); 3,55 (2H, m., N-<math>\text{CH}_2\text{-CH}_2\text{-}</math>); 5,50 (1H, dd., <math>J = 7,9</math>; 10,4; 9'-<math>\text{H}</math>); 5,85 (1H, dd., <math>J = 4,1</math>; 9,8; 3'-<math>\text{H}</math>); 6,38 (1H, dd., <math>J = 3,5</math>; 8,2; 6'-<math>\text{H}</math>); 6,55 (1H, d., <math>J = 7,9</math>; 7''-<math>\text{H}</math>); 6,7 (1H, m., 10'-<math>\text{H}</math>); 6,81 – 7,00 (4H, m., 8-<math>\text{H}</math>, 4'-<math>\text{H}</math>, 5'-<math>\text{H}</math>, 5''-<math>\text{H}</math>); 7,06 (1H, d., <math>J = 7,3</math>; 4''-<math>\text{H}</math>); 7,10 – 7,26 (2H, m., 6-<math>\text{H}</math>, 6''-<math>\text{H}</math>); 7,5 (1H, t., <math>J = 7,6</math>; 7-<math>\text{H}</math>); 8,11 (1H, m., 5-<math>\text{H}</math>).</p> <p>(Figure 3 and 4)</p>    |
|  <p>(2c)</p> | <p>1.25 (6H, c, 3''- (<math>\text{CH}_3</math>)<sub>2</sub>); 2.65 (3H, s., 1''- <math>\text{CH}_3</math>); 3.17 (3H, s., 3-<math>\text{CH}_3</math>); 5.50 (1H, dd., <math>J = 8.8, 19.2</math>, 9'-<math>\text{H}</math>); 5.87 (1H, d., <math>J = 9.8</math>, 3'-<math>\text{H}</math>); 6.40 (1H, d., <math>J = 8.1</math>, 6'-<math>\text{H}</math>); 6.5 (1H, d., <math>J = 7.7</math>, 7''-<math>\text{H}</math>); 6.6 – 7.3 (8H, m., 7-H, 8-<math>\text{H}</math>, 4'-<math>\text{H}</math>, 5'-<math>\text{H}</math>, 10'-<math>\text{H}</math>, 4''-<math>\text{H}</math>, 5''-<math>\text{H}</math>, 6''-<math>\text{H}</math>); 7.48 (1H, t., <math>J = 7.4</math>, 6-<math>\text{H}</math>); 8.08 (1H, d., <math>J = 7.8</math>, 5-<math>\text{H}</math>).</p> <p>(Figure 5 and 6)</p>                                                                                                                                                                                                        |

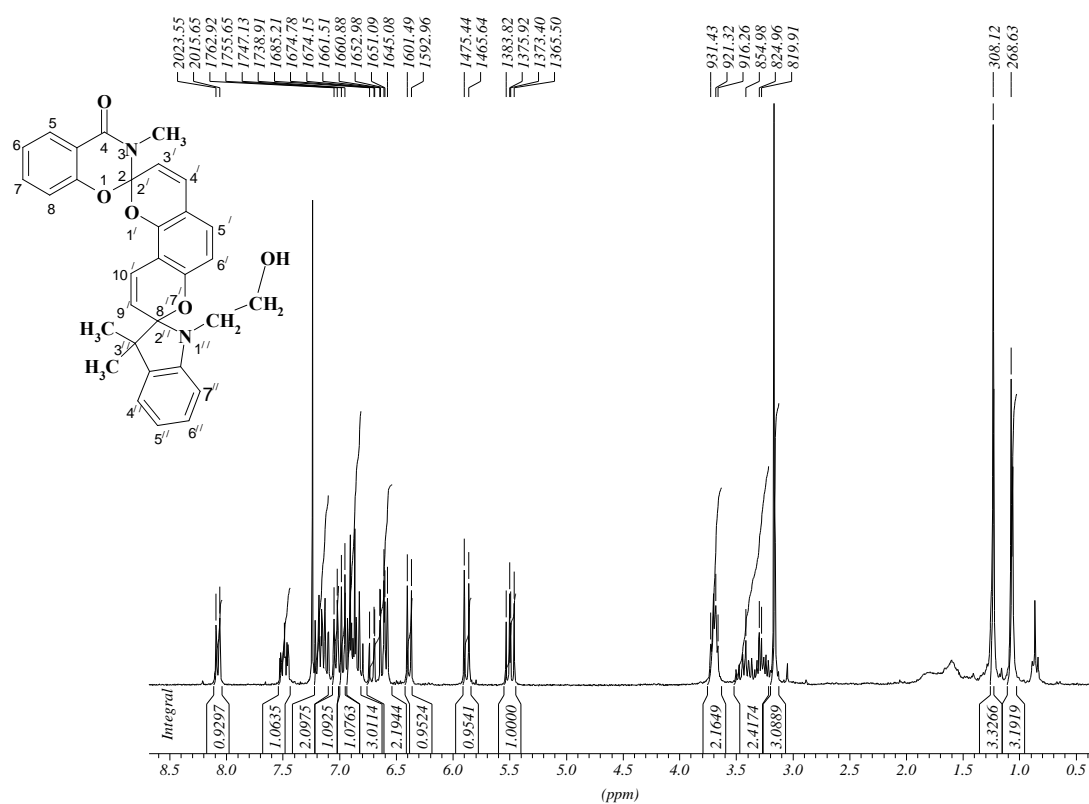

Figure 1. General NMR <sup>1</sup>H spectrum of (2a)

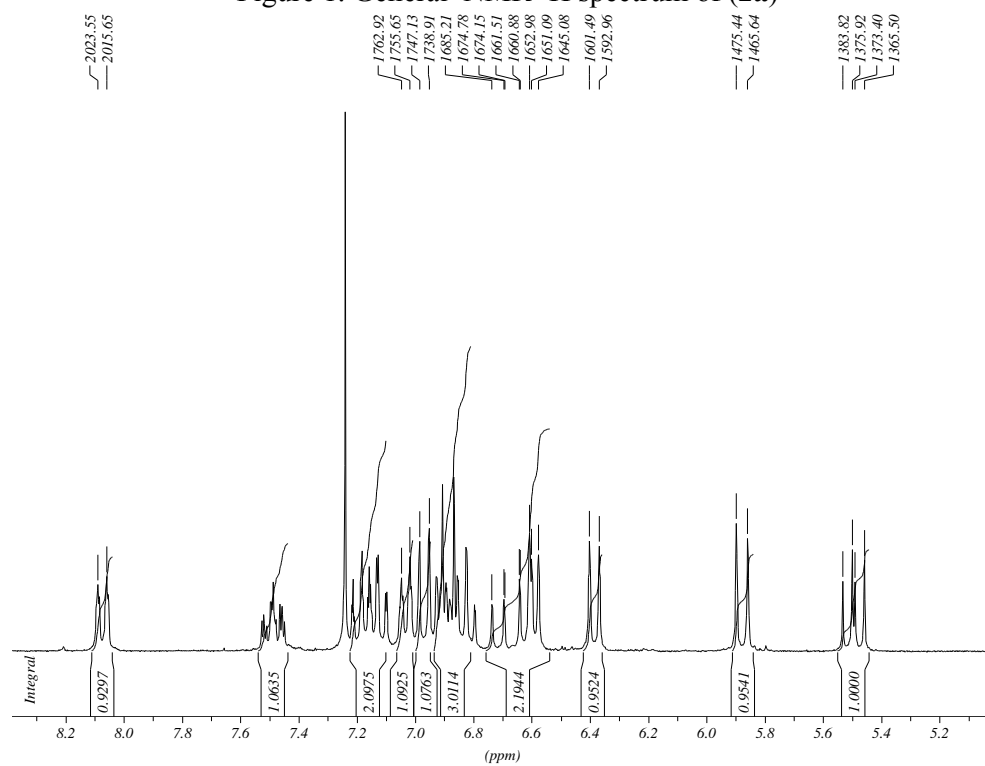

Figure 2. 5,2 - 8,2 ppm. area of NMR <sup>1</sup>H spectrum of (2a)

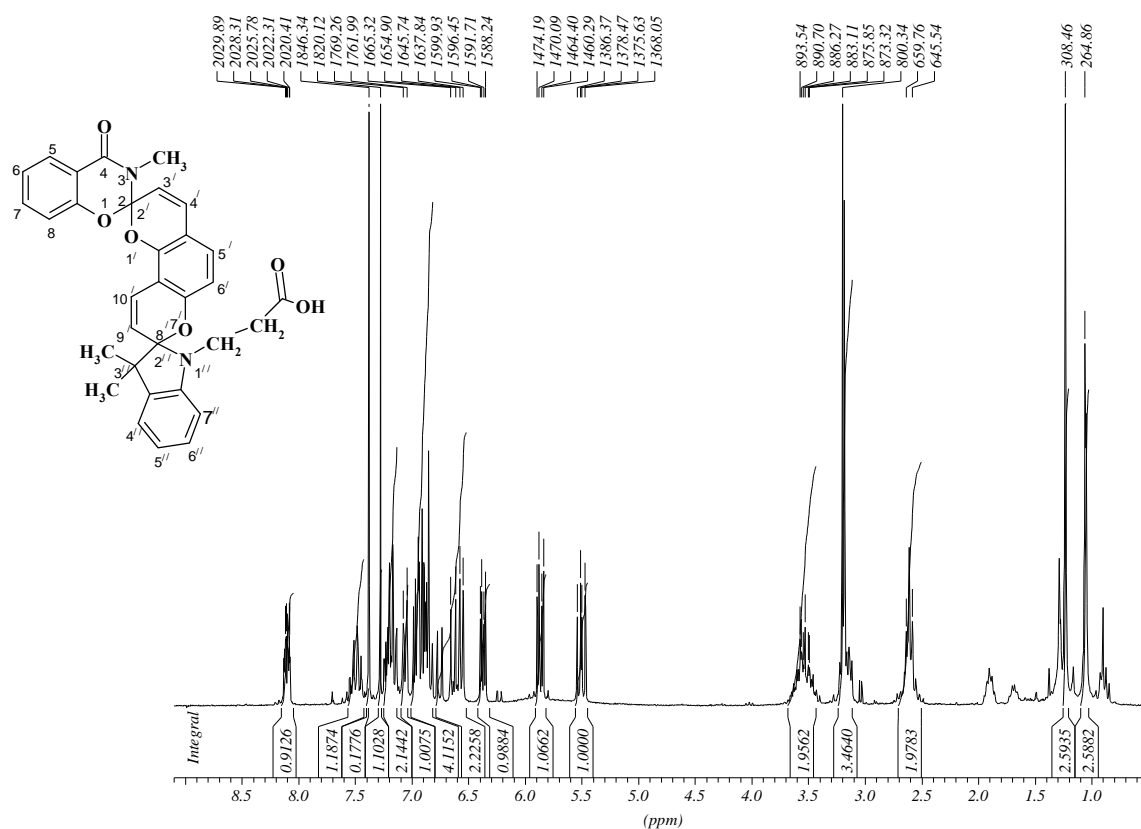

Figure 3. General  $^1\text{H}$  NMR spectrum of (2b)

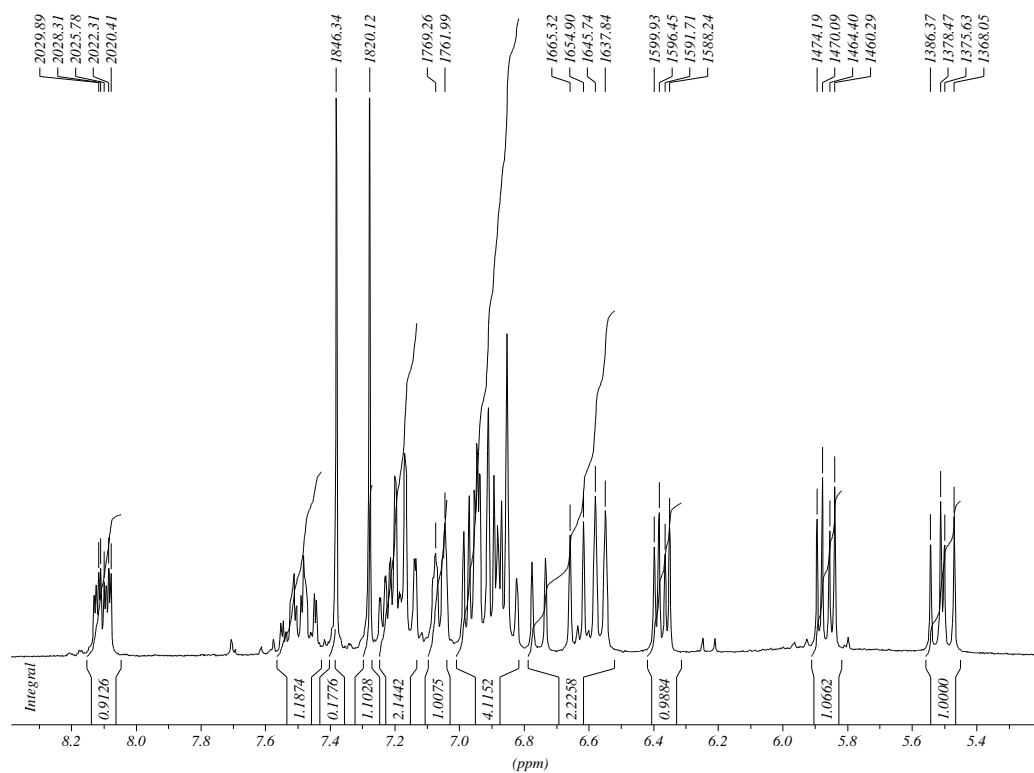

Figure 4. 5,4 - 8,3 ppm. area of  $^1\text{H}$  NMR spectrum of (2b)

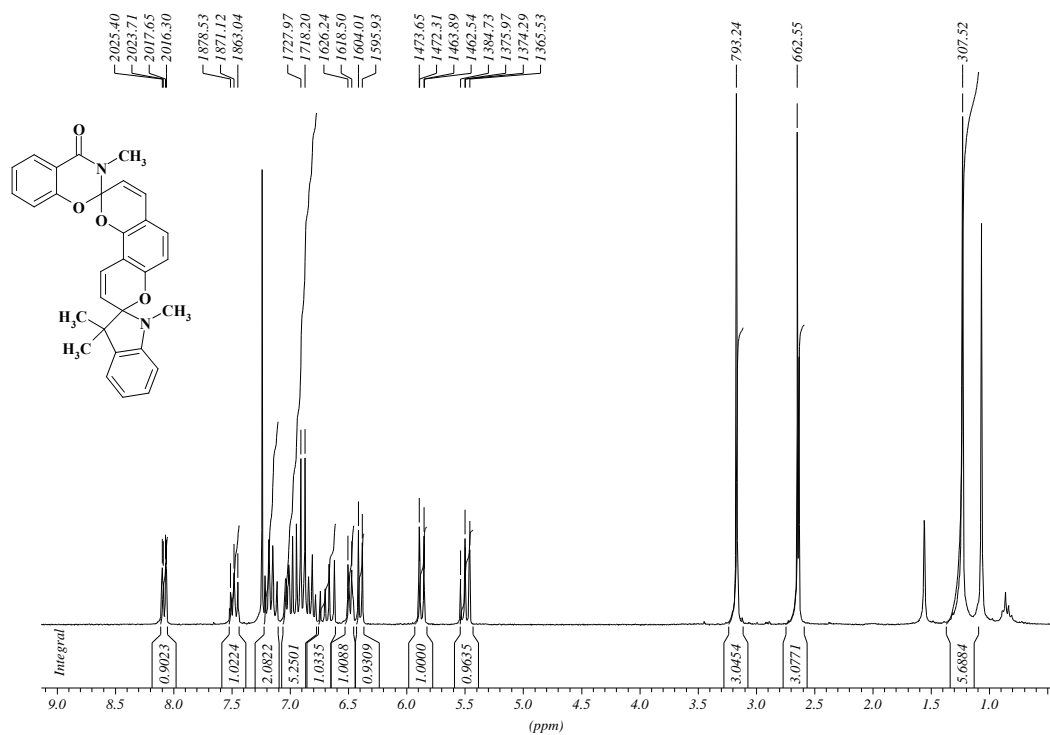

Figure 5. General NMR  $^1\text{H}$  spectrum of (2c)

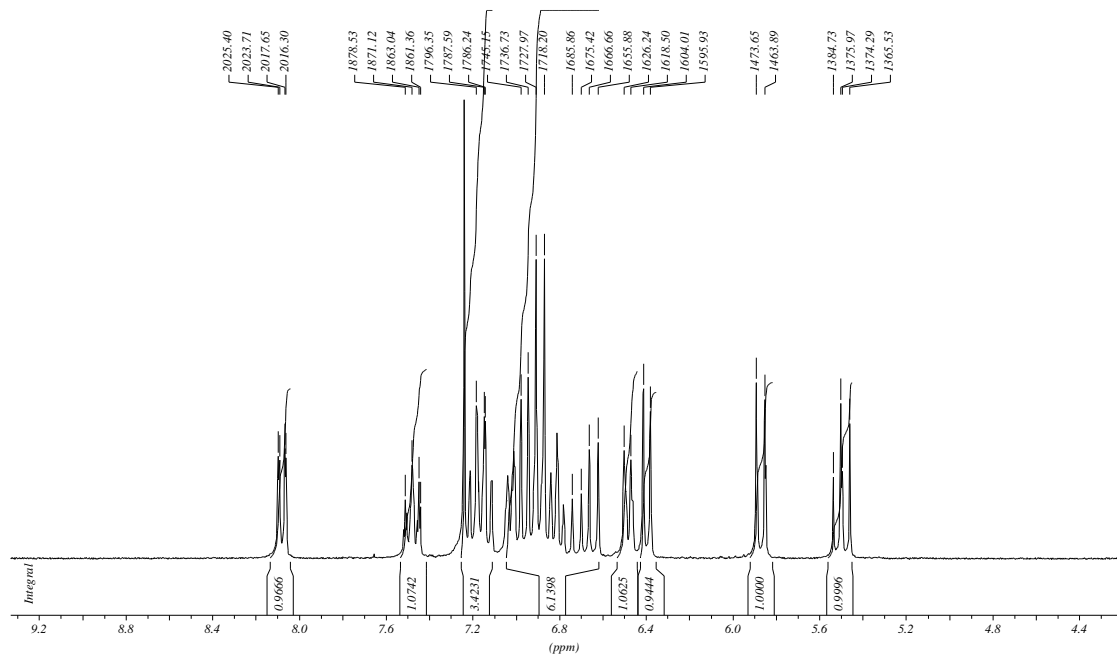

Figure 6. 4.4 – 9.2 ppm. area of NMR  $^1\text{H}$  spectrum of (2c)

### Data of IR-spectra for (2a-c)

| №    | $\nu_{\text{O-H}}$ | $\nu_{\text{C=O}}, \text{cm}^{-1}$ | $\nu_{\text{C=C}}, \text{cm}^{-1}$ | $\nu_{\text{C}_{\text{spiro-O}}}, \text{cm}^{-1}$ |
|------|--------------------|------------------------------------|------------------------------------|---------------------------------------------------|
| (2a) | 3415               | 1654                               | 1605                               | 936, 954                                          |
| (2b) | 3380, 3424         | 1683, 1744                         | 1606, 1643                         | 1007, 1023                                        |
| (2c) | -                  | 1683                               | 1606, 1643                         | 951, 1007                                         |

$^1\text{H}$  NMR spectra were recorded on a FT-NMR AVANCE 600 МГц in  $\text{CDCl}_3$ . The chemical shifts were recorded in ppm ( $\delta$  units). IR spectra were recorded on a Varian Excalibur 3100 FT-IR spectrometer.
